# Supplementary material
Source: MDPI journal article supplement (https://www.mdpi.com/2297-8739/8/7/101)
Supplement: s1 [file s1]

**Table S1.** Concentrations of pesticides in rainwater.

| Sites<br>(Country)                 | Pesticides concentration (ng/L) |      |      |      |      | Ref.       |
|------------------------------------|---------------------------------|------|------|------|------|------------|
|                                    | ALA                             | CAR  | DIU  | PYR  | TEB  |            |
| Strasbourg<br>(France)             | 5590                            |      | 1025 |      |      | [1]        |
| Haut-Rhin<br>(France)              |                                 | N.D. | 20   | 20   |      | [2]        |
| Brunswick<br>land<br>(Germany)     |                                 |      |      |      | 187  | [3]        |
| Zurich<br>(Switzerland)            | 191                             |      |      |      |      | [4]        |
| Chunchen<br>(Republic of<br>Korea) | N.D.                            | N.D. | N.D. | N.D. | N.D. | This study |

N.D. = not detected.

## References

1. Scheyer, A.; Morville, S.; Mirabel, P.; Millet, M. Pesticides analysed in rainwater in Alsace region (Eastern France): Comparison between urban and rural sites. *Atmospheric Environment* **2007**, *41*, 7241-7252.
2. Martin, S.; Bertaux, A.; Le Ber, F.; Maillard, E.; Imfeld, G. Seasonal Changes of Macroinvertebrate Communities in a Stormwater Wetland Collecting Pesticide Runoff From a Vineyard Catchment (Alsace, France). *Archives of Environmental Contamination and Toxicology* **2012**, *62*, 29-41, doi:10.1007/s00244-011-9687-6.
3. De Rossi, C.; Bierl, R.; Riefstahl, J. Organic pollutants in precipitation: monitoring of pesticides and polycyclic aromatic hydrocarbons in the region of Trier (Germany). *Physics and Chemistry of the Earth, Parts A/B/C* **2003**, *28*, 307-314, doi:https://doi.org/10.1016/S1474-7065(03)00052-4.
4. Bucheli, T.D.; Müller, S.R.; Heberle, S.; Schwarzenbach, R.P. Occurrence and behavior of pesticides in rainwater, roof runoff, and artificial stormwater infiltration. *Environmental Science & Technology* **1998**, *32*, 3457-3464.
